# Supplementary material for: Oct4 differentially regulates chromatin opening and enhancer transcription in pluripotent stem cells
Source: eLife journal article supplement (doi:10.7554/elife.71533), 2022-05-19
Supplement: fig8-data1 [file elife-71533-fig8-data1-v1.zip]

## Sheet: 2021-10-19 WB +15Tub fig
		Lane	Band	Relative	Lane	Peak	Average	Trace	Relative		Oct4/tub	rel. to WT
		Number	Number	Front	Name	Int	Int	Int x mm	Qty
0	O4	1	1	0.347	#1	16284	6735.46	17512.2	34.701		1.76558	1
	tub	1	2	0.779	#1	35885	13443.1	30919.2	61.267
+15	O4	2	1	0.358	#2	16794	6651.74	17959.7	91.854		0.0108632	0.00615277
	tub	2	4	0.768	#2	414	195.1	195.1	0.998
-1.5	O4	3	1	0.337	#3	16642	6647.81	17949.1	94.87		0.00259066	0.00146731
	tub	3	3	0.758	#3	71	33.214	46.5	0.246
-3	O4	4	1	0.337	#4	16944	6918.81	18680.8	91.274		0.039843	0.0225665
	tub	4	2	0.747	#4	1006	465.188	744.3	3.637
-4.5	O4	5	1	0.326	#5	17142	6926.54	19394.3	82.079		0.153571	0.0869804
	tub	5	2	0.737	#5	3926	1861.5	2978.4	12.605
-6	O4	6	1	0.326	#6	16641	6833.39	19133.5	71.499		0.30282	0.171513
	tub	6	5	0.737	#6	7561	3621.25	5794	21.651
-9	O4	7	1	0.316	#7	17474	6927.89	19398.1	62.839		0.487182	0.275933
	tub	7	2	0.726	#7	12330	5559.06	9450.4	30.614
-12	O4	8	1	0.305	#8	16727	6773.93	18967	57.177		0.618031	0.350044
	tub	8	2	0.716	#8	14926	6169.58	11722.2	35.337
-15	O4	9	1	0.305	#9	17582	6921.33	18687.6	56.797		0.653867	0.370341
	tub	9	2	0.716	#9	15553	5554.18	12219.2	37.138
