# Supplementary material for: Oct4 differentially regulates chromatin opening and enhancer transcription in pluripotent stem cells
Source: eLife. 2022 May 27;11:e71533. doi: 10.7554/eLife.71533 (PMC9142147; doi:10.7554/eLife.71533)
Supplement: Supplementary file 3. [file elife-71533-supp3.xlsx]

## Sheet: Gene_list
Early_down_genes	Late_down_genes	Early_down_SE_genes	Late_down_SE_genes	Early_Up_genes	Late_up_genes
1700008O03Rik	1700061G19Rik	Hs6st1	Lefty2	Aaed1	2010111I01Rik
1700019D03Rik	Abcb1a	Tfcp2l1	Gli2	AC175538.2	2310030G06Rik
2610318N02Rik	Abcb1b	Gpa33	Vdac1	Acsl1	2510009E07Rik
4930453N24Rik	Acaa2	Prdm14	Mllt6	Acss2	4930522L14Rik
4931428F04Rik	Adam19	Mreg	Pipox	Actr1a	4933415A04Rik
A930004D18Rik	Adar	Gbx2	Mycn	Adam10	5031439G07Rik
Acadm	Adsl	Inhbb	F2rl1	Adgrg1	A3galt2
Accsl	Agpat2	Nr5a2	Rpap3	Agpat3	Aacs
Acot7	AI464131	Upp1	Spry4	Ahdc1	Abcd4
Acot9	Akap1	Cobl	Ankrd35	AI661453	Abhd14b
Adap1	Ankrd35	Cenpv	Kank4	Alg8	Abhd4
Adat2	Anp32a	Ubtf	Hsd17b14	Ap3s1	Ablim1
Adipor2	Aplp1	Esrrb	Utf1	Aplp2	Abr
Adnp2	Apobec3	Itpk1	Zbtb45	Apobec2	Acnat1
Adrb3	Apod	Klf5	Lrrc2	Arf2	Acot13
Agtpbp1	Aqp3	Zfhx2		Armcx4	Acox1
Akap5	Arhgef15	Tdh		As3mt	Acsf2
Akna	Arhgef18	Spry2		Asf1a	Acsl3
Akr1b3	Arl14epl	Jam2		Atg9a	Acsl4
Aldh18a1	Asap3	Usp7		Atp1a1	Acvr2b
Alg13	Asns	Pou5f1		Atp2b4	Adamts10
Alpl	Atrx	H2-M5		Aurkc	Add1
Anxa11	Baiap2	Id1		AW549877	Adgrl2
Apela	Bcl3	Ift52		B4galt1	Afap1l1
Ash2l	Bms1	Mybl2		B4galt5	Agl
Atp11c	Brwd1	Sall4		Bahd1	Ahcyl1
AU018091	Bzw1	Sox2		Bend4	Ahr
B4galnt4	C130073F10Rik	Ssr2		Bhlhe40	AI314180
Basp1	Cacng7	Tet2		Bin2	Akr1a1
Bcap29	Cacybp	Usp48		Blcap	Aldh7a1
Bcat1	Ccnd1	Epha2		Bri3	Ankrd52
Bckdha	Cdc45	Klf4		Car13	Anxa5
Bcl2l14	Cdc5l	Alpl		Car2	Anxa6
Bcl6	Cdk1	Klf3		Card6	Apobr
Bid	Cdk11b	Tbx3		Casp3	Appl2
Brca2	Cdx1	Nanog		Ccdc112	Arap2
Brf1	Ceacam1	Mkrn1		Ccdc160	Arfgap3
Brpf3	Celf4	Phc1		Ccm2	Arhgap10
Brsk1	Cggbp1	Tead1		Ccng2	Arhgef17
Cachd1	Chaf1b	Fgf4		Ccnjl	Arl2bp
Calcoco2	Chmp4c	Ctbp2		Cdh3	Arl3
Camkk2	Ckap4	Klf2		Cdip1	Arl4c
Cand1	Ckb	Gpt2		Cep76	Asl
Cars2	Coro1c	Zfp42		Chka	Atp6v1e1
Cbarp	Crip2	Stoml1		Chst2	Atrnl1
Ccdc9	Csrp2			Cldn14	Avil
Cd55	Cttnbp2			Cnot8	Axin2
Cdc37l1	D930048N14Rik			Copa	B3galnt2
Cdc42ep5	Dclk2			Cotl1	Bace1
Cdca5	Dcstamp			D230025D16Rik	Bach1
Cdyl	Dctd			Dcbld2	Baiap2l1
Cdyl2	Ddah1			Dennd5a	Banp
Cenpv	Ddc			Depdc7	Bax
Cep55	Ddi2			Dixdc1	Bbc3
Cep63	Ddx21			Dnajc25	Bbip1
Chac1	Ddx43			Dscr3	Bbx
Chn1	Def6			Dyrk2	Bcam
Cnpy1	Denr			Efhd2	Bcl2l1
Cobl	Dgke			Eomes	Bcl2l11
Cryz	Dmtn			Fads1	Bcl9
Csrnp3	Dnaaf5			Fads2	Bcl9l
Ctbp2	Dnajc7			Fads6	Bcor
Ctgf	Dnttip2			Fam102a	Bdh1
Cth	Dppa4			Fam160b1	Bicdl1
Ctsc	Dpy30			Fam199x	Blvrb
Cxadr	Dscc1			Fbxl12	Bmp7
D16Ertd472e	Dtl			Fmn1	Bnipl
D1Pas1	Dusp6			Fxyd6	Btg1
Dapp1	Dut			G2e3	Cables1
Dcp2	E2f2			Gca	Cadm1
Ddhd2	E2f8			Glrx	Cand2
Ddx58	Ebp			Gm17657	Car8
Deptor	Efhb			Gpat3	Casp6
Diaph1	Eftud2			Gpd1l	Cat
Dido1	Eif2s2			Gramd4	Cbr3
Dnajb6	Eif3l			Gss	Ccdc136
Dnajc21	Elac2			Gstz1	Ccdc93
Dnmt3l	Emp1			H6pd	Ccl25
Dstn	Epp13			Hbp1	Ccni
Dus4l	Etf1			Hgsnat	Cd164
Dusp27	Etv1			Hk1	Cd24a
Eed	Etv4			Hmgcs1	Cd276
Eef1akmt3	F2rl1			Hnrnph3	Cd63
Eef1e1	Fam208a			Hoxc13	Cdc14a
Ei24	Fam25c			Idh2	Cdc42bpb
Eif2b5	Fam26e			Idnk	Cdk17
Eif4e2	Fam81a			Iffo2	Cdkn1a
Elavl2	Fan1			Igdcc3	Cdkn2a
Enoph1	Fancd2			Igfbp2	Cdkn3
Epas1	Fblim1			Impad1	Celf2
Epb41l4b	Fbxo15			Ing2	Cep170b
Epha2	Fbxo5			Jdp2	Chid1
Epha4	Fgfr2			Kctd15	Chn2
Epn2	Flrt3			Klc1	Chpt1
Eps8	Fn1			Klhdc7a	Cidea
Ercc4	Frmd6			Klhl15	Ciz1
Esrrb	Fsd1l			Klhl2	Clcn5
Etv5	Ftl1-ps1			Klhl25	Cldn3
Exo1	Fus			Kyat3	Cldn4
Exosc5	G3bp1			Ldhb	Clic4
Fam107b	Gabpa			Litaf	Clk4
Fam129b	Gars			Lix1	Cln3
Fam169a	Gemin8			Llgl2	Cln6
Fam207a	Gins1			Lonrf1	Cmip
Fam60a	Gins4			Lpar6	Cnn3
Fanci	Gjb4			Man2a2	Col18a1
Fbrsl1	Gjc1			Map3k14	Coq8b
Fgf4	Gli2			Map3k8	Coro7
Fis1	Gm14322			Map7	Cpd
Fiz1	Gm14418			Map7d1	Cpt2
Fkbp1b	Gmnn			Mapk9	Crat
Flnb	Gnl3			Mapkapk2	Creg1
Foxd3	Got1			Mapkapk3	Crtc3
Foxh1	Gpatch4			Mcur1	Csrp1
Foxp4	Gpr4			Mdfic	Ctnnb1
Frmd4b	Gprc5b			Mfsd7c	Ctnnd2
Fry	Gsta3			Mier1	Ctsb
Fstl1	Gtsf1l			Mkln1	Cuedc1
Ftsj1	Guf1			Mpc1	Cul4a
Fut9	H2afz			Mrnip	Cxx1c
Fzd5	Helb			Msmo1	Cxxc5
G3bp2	Hirip3			Nadsyn1	Cyb5a
Gabarapl2	Hist1h2bg			Napepld	D5Ertd579e
Gabbr1	Hist1h2bh			Ncf2	D630045J12Rik
Galnt2	Hist1h2bl			Nckap5l	Dag1
Gbgt1	Hist1h4j			Nfe2l2	Dcaf4
Gbx2	Hist2h4			Ngfr	Dcaf5
Gdf3	Hpdl			Nol4l	Ddit4
Gemin7	Hsd17b14			Nuak2	Dedd2
Gfpt2	Hsf2bp			Nudt4	Dennd1c
Gid8	Icam1			Nup62cl	Dennd5b
Glud1	Ice1			Osbp	Des
Gm13212	Il34			Palm	Dgka
Gm14325	Il6st			Parm1	Dguok
Gm14393	Ildr1			Pcyox1l	Dlg3
Gm14401	Impa2			Pde8a	Dmrt1
Gm14406	Ino80c			Pdk1	Dnajb4
Gm16253	Iqgap3			Pdk4	Dnajc22
Gm21992	Jak3			Pdp2	Dnajc3
Gm27021	Junb			Pea15a	Dsp
Gm28051	Jup			Phf10	Dtnbp1
Gm45717	Kank4			Plekho2	Dtx1
Gm45871	Kcnk5			Plxdc1	Dtx2
Gna13	Kif23			Ppm1k	Dusp3
Gnpnat1	Kif2c			Primpol	Dusp9
Gpa33	Knop1			Prmt7	Edem1
Gpr107	Kxd1			Prmt8	Efna3
Gpr160	Lck			Ptch2	Egln3
Gprc5a	Lefty2			Rab18	Elf4
Gpt2	Lifr			Rab21	Elovl1
Grsf1	Llph			Rab3il1	Eno1
Gtse1	Lrr1			Rbms1	Eno3
H2-M5	Lrrc2			Rel	Epb41
Hdac1	Lrrc31			Rgmb	Epb41l2
Hdac2	Lrrc34			Rgs3	Epcam
Hexb	Ltbp4			Ripk4	Eps15
Hist2h3c1	Ly6e			Ripor1	Eps8l2
Hk2	Map6			Rlim	Esd
Hmces	Map9			Rusc2	Etnk1
Hs6st1	Mat2b			S100a13	Evl
Hsd17b11	Mcm10			S1pr2	Extl3
Hspbap1	Mcm3			Scarb1	F3
Hunk	Mllt6			Scd1	Fabp3
Id1	Mme			Sema3f	Fam122b
Id3	Mmp17			Sema4g	Fam198b
Ift52	Mmrn2			2009-09-01	Fam222a
Ing5	Mras			Serpinb9b	Fbln1
Inhbb	Mrpl39			Sertad2	Fbrs
Irak3	Mrpl42			Sertad3	Fbxl20
Itfg2	Mthfd2			Sfxn2	Fbxo18
Itga5	Mtm1			Sfxn4	Fbxo21
Itgb5	Mtmr7			Sgce	Fbxw4
Itpk1	Mycn			Sgpl1	Fdx1
Itpka	Myo19			Skp1a	Fech
Jade2	Mypn			Slc16a14	Fem1b
Jam2	N4bp3			Slc22a5	Fermt2
Kat6b	Naca			Slc25a25	Fgfbp3
Kat7	Nap1l1			Slc25a51	Fgfr1
Kbtbd11	Nbn			Slc31a1	Fgfrl1
Kbtbd8	Ncl			Slc35b4	Fhl1
Kdm3a	Ndufa10			Slc6a7	Flot2
Kdm3b	Ndufaf4			Slc9a6	Flywch1
Kdm5b	Ndufb5			Smad6	Foxn3
Kit	Necab2			Snx1	Foxo3
Klf2	Nfkbid			Sowahb	Frem2
Klf3	Nfya			Spg21	Frmd4a
Klf4	Nid2			Spryd7	Frs2
Klf5	Nifk			Spsb1	Fth1
Klf8	Nkrf			Srcin1	Fuca1
Klhl22	Nlrp4a			Suv39h1	Fuca2
Klhl7	Noct			Suv39h2	Fzd2
L1td1	Nop14			Synj2	Gabarapl1
Lactb2	Nop56			Tacc1	Gad1
Lama1	Notch4			Tcaim	Gadd45g
Lamc1	Nphs1			Tcf7	Gan
Lap3	Nsun2			Tdp1	Gclc
Lemd1	Nup210			Tecpr1	Gclm
Lima1	Nup85			Tfrc	Gcnt1
Liph	Olfr539			Thpo	Gde1
Lmo4	Ooep			Tia1	Gdf11
Lpar5	Paip2b			Tmem37	Gfpt1
Lpcat1	Pask			Tnfrsf1a	Ggta1
Lpin1	Pcbd2			Tpcn1	Gli3
Lrpap1	Pcnt			Trappc10	Gm20662
Lyplal1	Pdgfa			Tspan3	Gm20708
Map10	Pfkp			Ube2f	Gm28539
Map2k6	Phf11d			Ugcg	Gm2a
Mcf2	Phgdh			Unc13a	Gm45716
Meaf6	Pipox			Usp2	Gmfb
Meis2	Pla2g1b			Usp3	Gmip
Mex3a	Plscr1			Usp33	Gns
Mgme1	Pml			Vangl1	Gpcpd1
Mitf	Pole			Vav2	Gprc5c
Mknk1	Polr2f			Vezf1	Grasp
Mkrn1	Pomp			Vipas39	Grhl3
Mob3c	Ppat			Wdyhv1	Grina
Mok	Ppm1j			Whrn	Gsr
Morc1	Ppp1r14d			Wsb2	Gstp2
Mreg	Prex2			Ybx2	Gtf2i
Mrps31	Prim1			Zbtb38	Gucd1
Msantd3	Prkar1b			Zfp101	Gzf1
Msc	Prpf31			Zfp146	H2afy2
Msh6	Prss35			Zfp202	Hacd3
Msrb2	Psat1			Zfp326	Hand1
Mtfr1	Psip1			Zfp418	Hat1
Mthfd1	Pum3			Zfp516	Heca
Mtss1	Rabif			Zfp60	Herc3
Mybl2	Rad51ap1			Zfp773	Hic2
Myc	Rad54l			Zfp787	Hivep1
Mylpf	Rbfa			Zfp799	Hmox1
Myo1b	Rcc2			Zfp85	Hnrnpll
Myof	Rfc4			Zfp952	Hpcal1
Naa35	Rfx2			Zfp974	Hs3st3b1
Nanog	Ric3			Zfyve21	Hsf5
Natd1	Rif1			Zscan2	Hspb8
Ncor1	Rlbp1			Zwint	Idua
Ndufa9	Rnaseh2a				Ier5
Ndufaf5	Rnd1				Ifnar2
Nectin1	Rnf213				Ift43
Nfatc2ip	Rpap3				Igf2
Nfib	Rps6kl1				Igf2bp2
Nid1	Rrm1				Il6ra
Ninl	Rrn3				Inf2
Nipal3	Rrp1b				Inpp5a
Nkx6-2	Rtkn2				Inppl1
Nodal	Rundc3a				Ip6k2
Nol9	Ruvbl1				Irak2
Nqo2	S100a10				Irf2bp2
Nr0b1	S100a11				Irs2
Nr1d2	2001-09-01				Ism2
Nr5a2	Serbp1				Isoc1
Ntn1	Set				Itgav
Nudt1	Shmt1				Itm2b
Oas1a	Slbp				Itm2c
Oas1g	Slc18b1				Ivd
Orc1	Slc25a15				Jak1
Pabpc4	Slc4a5				Jun
Pald1	Smg5				Kank1
Panx1	Sntb1				Kazn
Parp9	Snx18				Kcnj12
Paxip1	Sod2				Kctd1
Pcgf6	Sox13				Kif3a
Pck2	Sp2				Kif3c
Pcolce2	Spp1				Klf6
Pcsk6	Spry4				Klf7
Pdss1	Sptan1				Klhdc2
Peli2	St6galnac2				Klhl26
Pelp1	St8sia6				Kmt2e
Phc1	Stag3				Kpna6
Pias2	Sult6b1				Lad1
Piga	Taf1a				Lamb1
Pigl	Tcea3				Lhfpl2
Plekhg5	Tcof1				Limd1
Plekhm1	Tead4				Limk2
Pmepa1	Tfap4				Lin28a
Poglut1	Tfdp1				Lmf1
Porcn	Tfeb				Lpl
Pou5f1	Thtpa				Lrrc29
Ppargc1b	Ticrr				Lrrc41
Ppp2r2d	Timp1				Lrrc58
Pramef12	Tmem231				Lrrc8c
Pramef8	Tmem243				Lrrfip1
Prdm14	Tnfrsf21				Lzts2
Prep	Tnk2				Man1c1
Prickle1	Tpm3				Man2a1
Prkaa2	Trap1				Map1b
Prkcg	Trh				Map3k4
Prps2	Triml2				Map3k9
Prr13	Trip13				2002-03-01
Prr14	Trp53				2008-03-01
Pycr2	Tubb3				Mark4
Rab29	Twistnb				Mbd2
Rab4a	Umps				Mbd6
Rad1	Usp10				Mblac2
Rap1gap	Usp36				Mbnl2
Rarg	Utf1				Mbp
Rbpms2	Utp3				Mdm2
Rcan3	Vdac1				Med12
Rcl1	Vgll3				Mef2d
Rdm1	Wars				Mest
Reep1	Wdr62				Mettl27
Rest	Wdr76				Mex3c
Rhpn2	Wdr89				Mgat1
Rnd3	Xaf1				Mia3
Rnf125	Xrcc6				Mipol1
Rnf19b	Zbtb45				Mllt3
Rpap1	Zbtb8os				Mlxip
Rpl10l	Zc3h8				Mlxipl
Rpp14	Zcchc10				Mprip
Rpp25	Zfp454				Mpzl1
Rsl24d1	Zfp459				Mpzl3
Rtel1	Zfp473				Mroh1
Rtn4	Zfp59				Mrs2
S1pr1	Zfp607b				Msi1
Sall4	Zfp626				Msl3
Sap30	Zfp7				Mt2
Sbk1	Zfp706				Mtss1l
Schip1	Zfp936				Mvp
Setdb1	Zfp977				Mxd1
Setx	Zfp979				Myh10
Sfrp1	Zmat2				Myh7b
Sh2d4b	Znfx1				Mylip
Sh3bp5l	Zscan10				Nadk2
Sh3d21					Nampt
Sh3gl2					Ndst2
Shb					Nedd1
Shf					Neu1
Sirt1					Nfil3
Skida1					Nfxl1
Skp2					Nhsl1
Slc25a40					Nkain1
Slc28a1					Nmrk1
Slc31a2					Notch1
Slc35f2					Notum
Slc41a1					Npcd
Slc45a4					Nqo1
Slc7a3					Nrp2
Sms					Nsd2
Smtnl2					Nuak1
Snx5					Nudt8
Socs2					Nup88
Sox2					Nxn
Spats1					Osbpl9
Spic					Osgin1
Spire2					Ostf1
Spry2					Oxct1
Ss18					P2rx4
Ssr2					P4ha1
Stk35					Pacs1
Stk38					Pacsin2
Stmn2					Palld
Stoml1					Papss1
Sugp2					Parp4
Sun1					Patz1
Surf6					Pbx1
Susd2					Pcgf3
Taf5l					Pcyox1
Tbc1d13					Pdcd6ip
Tbc1d2					Pde4a
Tbc1d24					Pdia5
Tbc1d25					Pdlim7
Tbx3					Peg10
Tcf7l1					Peg3
Tcl1					Pex26
Tdgf1					Pfn2
Tdh					Pgd
Tdrd12					Pgpep1
Tdrp					Phf2
Tead1					Phlda1
Tefm					Pi4k2b
Tenm4					Pigh
Tet2					Pik3c2b
Tfap2a					Pir
Tfcp2l1					Pkd1
Them4					Pkn1
Tigar					Pkp2
Timm23					Pla2g12a
Tle1					Plbd2
Tle4					Plekha1
Tma16					Plekhh1
Tmem39a					Plgrkt
Tmem47					Plk3
Tmem64					Plpp3
Tpd52l1					Pltp
Trim24					Pnrc1
Trim44					Por
Trmt44					Ppfibp1
Trps1					Ppp1r13b
Tspan14					Ppp1r9b
Ttc39b					Ppp2r3a
Ttf1					Prdx6
Ttl					Prkcd
Ttll3					Prkra
Ttyh2					Prob1
Tyms					Proser2
Tyw3					Prss8
Uba2					Prtg
Ubqln4					Prune1
Ubr5					Ptch1
Ubr7					Ptgr1
Ubtf					Ptk7
Ubxn2a					Ptpn14
Uggt1					Ptpn9
Ulk1					Ptprj
Upp1					Ptprs
Urb2					Rab11a
Urm1					Rab11fip1
Usp48					Rab15
Usp7					Rai1
Utp14a					Ralb
Vegfc					Ralgps1
Wdr43					Rassf8
Wdr5					Rbbp7
Wdr82					Rcor3
Yars					Rec8
Yes1					Reep5
Ywhaq					Rffl
Zbtb7a					Rgma
Zbtb8a					Rhbdd1
Zc3h12a					Rhob
Zc3h4					Rhod
Zcchc24					Rhog
Zfhx2					Rnf11
Zfp219					Rnf14
Zfp296					Rnf141
Zfp35					Rnf216
Zfp42					Rnf38
Zfp518b					Rnf6
Zfp534					Rnpepl1
Zfp553					Rprd1a
Zfp560					Rragd
Zfp57					S100a1
Zfp64					Samd10
Zfp808					Sccpdh
Zfp819					Scd2
Zfp961					Scube3
Zfp980					Sdc4
Zfp985					Sec24d
Zfp987					Sel1l
Zfp989					Sema4d
Zfp990					2008-09-01
Zfyve1					Sergef
Zic2					Serpinh1
Zic5					Sesn3
Zmat5					Sfmbt2
Zmym1					Sgsm1
					Sh3bp4
					Shroom2
					Siah2
					Six4
					Slc19a2
					Slc22a23
					Slc25a23
					Slc25a53
					Slc29a1
					Slc2a1
					Slc2a3
					Slc30a2
					Slc30a9
					Slc33a1
					Slc35f5
					Slc38a4
					Slc43a2
					Smad3
					Smo
					Smox
					Smyd2
					Snhg11
					Snx19
					Snx2
					Snx21
					Snx25
					Soat1
					Socs5
					Sord
					Sos2
					Sox11
					Sp5
					Spaca6
					Spats2
					Spg20
					Sptssa
					Sqstm1
					Src
					Srebf2
					Srr
					Srxn1
					Ssbp3
					Ssx2ip
					St3gal3
					St3gal5
					Steap3
					Stx7
					Stxbp2
					Stxbp5
					Surf4
					Syde2
					Syne4
					Syngr1
					Synj1
					Sypl
					Tbc1d12
					Tbc1d9b
					Tbcel
					Tceal9
					Tcf4
					Tcirg1
					Tdg
					Tef
					Tesk1
					Tet3
					Tex2
					Tgfbr2
					Tgfbrap1
					Thap2
					Thap3
					Timm21
					Tinagl1
					Tirap
					Tjp1
					Tlcd2
					Tm9sf3
					Tmc4
					Tmc8
					Tmem117
					Tmem120b
					Tmem144
					Tmem164
					Tmem170
					Tmem170b
					Tmem19
					Tmem2
					Tmem40
					Tmem94
					Tnfrsf10b
					Tnfrsf19
					Tnnt1
					Top2b
					Tpm1
					Trim3
					Trim63
					Trio
					Trp53inp1
					Tspan9
					Ttc7
					Tubb6
					Twsg1
					Txnrd1
					Uap1
					Ubc
					Ube2j1
					Ubr2
					Ubtd1
					Ugdh
					Unc5b
					Usf3
					Usp24
					Vamp1
					Vamp4
					Vamp8
					Vangl2
					Vcan
					Vps37c
					Vsig10
					Vwa5a
					Wbp1l
					Wdfy1
					Wipi1
					Wls
					Yaf2
					Zadh2
					Zbtb21
					Zbtb34
					Zc3h12c
					Zcchc2
					Zfand4
					Zfp3
					Zfp318
					Zfp36l3
					Zfp385a
					Zfp426
					Zfp449
					Zfp652
					Zfp687
					Zfp703
					Zfp746
					Zfyve16
					Zmynd8
					Znrf3
					Zscan29
					Zswim8
					Zxdc
					Zyx
